# Supplementary material
Source: PubMed Central journal article supplement (PMC4514519)
Supplement: NIHMS704429-supplement-Supplemental_Data_File_1___doc___tif__pdf__etc__.pdf [file NIHMS704429-supplement-Supplemental_Data_File_1___doc___tif__pdf__etc__.pdf]

**Supplemental Table 1: Adjusted Hazard Ratio's for the Cardiovascular Disease Outcome associated with Medication Adherence by Race and Sex in CoSMO**

|                                                | Pharmacy Refill Adherence |                         |                   | Self-Reported Adherence |                        |                    |
|------------------------------------------------|---------------------------|-------------------------|-------------------|-------------------------|------------------------|--------------------|
|                                                | Low<br>MPR: <0.5          | Medium<br>MPR: 0.5-<0.8 | High<br>MPR: ≥0.8 | Low<br>MMAS-8: <6       | Medium<br>MMAS-8: 6-<8 | High<br>MMAS-8: =8 |
| <b>n(%) Blacks with CVD outcome (n=631)</b>    | 6(12.8)                   | 20(10.0)                | 33(8.6)           | 13(11.4)                | 26(11.3)               | 20(7.0)            |
| <b>Model 1</b>                                 | 1.41(0.59,3.37)           | 1.12(0.64,1.96)         | 1(reference)      | 1.87(0.93,3.77)         | 1.56(0.87,2.81)        | 1(reference)       |
| <b>Model 2</b>                                 | 1.57 (0.65,3.82)          | 0.98 (0.56,1.73)        | 1(reference)      | 1.38(0.67,2.86)         | 1.48(0.81,2.69)        | 1(reference)       |
| <b>Model 3</b>                                 | 1.46 (0.60,3.58)          | 0.98 (0.56,1.73)        | 1(reference)      | 1.40(0.67,2.92)         | 1.54(0.85,2.81)        | 1(reference)       |
| <b>n(%) Whites with CVD outcome (n=1,444)</b>  | 9(19.6)                   | 46(15.8)                | 126(11.4)         | 17(9.7)                 | 62(12.9)               | 102(12.9)          |
| <b>Model 1</b>                                 | 1.94(0.99,3.82)           | 1.38(0.99,1.94)         | 1(reference)      | 0.75(0.44,1.26)         | 0.97(0.71,1.33)        | 1(reference)       |
| <b>Model 2</b>                                 | 2.46(1.23,4.91)*          | 1.24(0.88, 1.75)        | 1(reference)      | 0.73(0.43,1.24)         | 0.91(0.66,1.25)        | 1(reference)       |
| <b>Model 3</b>                                 | 2.09 (1.00,4.35)*         | 1.25(0.89, 1.76)        | 1(reference)      | 0.67(0.39,1.17)         | 0.92(0.67,1.26)        | 1(reference)       |
| <b>n(%) Females with CVD outcome (n=1,241)</b> | 9(15.0)                   | 36(12.1)                | 73(8.3)           | 17(9.2)                 | 38(9.4)                | 62(9.7)            |
| <b>Model 1</b>                                 | 1.97(0.97,3.97)           | 1.54(1.02,2.31)*        | 1(reference)      | 1.02(0.59,1.75)         | 0.98(0.65,1.46)        | 1(reference)       |
| <b>Model 2</b>                                 | 2.59(1.25,5.34)*          | 1.40(0.93,2.11)         | 1(reference)      | 0.98(0.57,1.70)         | 0.98(0.65,1.47)        | 1(reference)       |
| <b>Model 3</b>                                 | 2.61(1.26,5.39)**         | 1.42(0.94,2.16)         | 1(reference)      | 0.95(0.55,1.66)         | 0.98(0.66,1.47)        | 1(reference)       |
| <b>n(%) Males with CVD outcome (n=834)</b>     | 6(18.2)                   | 30(15.5)                | 86(14.2)          | 13(12.8)                | 50(16.5)               | 59(13.8)           |
| <b>Model 1</b>                                 | 1.47(0.64, 3.39)          | 1.12(0.74,1.71)         | 1(reference)      | 0.92(0.49,1.72)         | 1.14(0.78,1.66)        | 1(reference)       |
| <b>Model 2</b>                                 | 1.54(0.66, 3.63)          | 1.01(0.66, 1.54)        | 1(reference)      | 0.80(0.43,1.49)         | 1.04(0.71,1.52)        | 1(reference)       |
| <b>Model 3</b>                                 | 1.19(0.47, 3.04)          | 0.99(0.65,1.52)         | 1(reference)      | 0.80(0.41,1.53)         | 1.08(0.74,1.59)        | 1(reference)       |

**Supplemental Table 1 continued**

\*p<0.05, \*\*p<0.01;

P-interaction (MPR Model 3) for Black / White = 0.801, for Male / Female = 0.339

P-interaction (MMAS-8 Model 3) for Black / White = 0.093, for Male / Female = 0.663

CoSMO-Cohort Study of Medication Adherence among Older Adults

HR-Hazards Ratio; 95% CI - 95% confidence interval

MPR-medication possession ratio

MMAS-8-Morisky Medication Adherence Scale-8 item

Composite Cardiovascular Disease (CVD) Outcome: myocardial infarction, congestive heart failure, stroke, cardiovascular death

CVD-cardiovascular disease

Model 1 adjusted for age, sex, race, marital status, and education.

Model 2 adjusted for age, sex, race, marital status, education, Charlson Comorbidity Index, number of classes of antihypertensive medications, and depressive symptoms.

Model 3 adjusted for age, sex, race, marital status, education, Charlson Comorbidity Index, number of classes of antihypertensive medications, depressive symptoms, BMI, smoking status, alcohol intake, and healthy lifestyle behaviors for blood pressure control (fruit and vegetable intake, exercise, and sodium reduction)
