# Supplementary material
Source: PubMed Central journal article supplement (PMC4514519)
Supplement: NIHMS704429-supplement-Supplemental_Data_File_2___doc___tif__pdf__etc__.pdf [file NIHMS704429-supplement-Supplemental_Data_File_2___doc___tif__pdf__etc__.pdf]

**Supplemental Table 2. Unadjusted and Adjusted Hazard Ratios for the Cardiovascular Disease Outcome associated with Antihypertensive Medication Adherence using the Proportion of Days Covered (PDC) measure**

|                           | n(%) with<br>CVD<br>outcome | Unadjusted<br>HR<br>(95% CI) | Model 1<br>HR<br>(95% CI) | Model 2<br>HR<br>(95% CI) | Model 3<br>HR<br>(95% CI) |
|---------------------------|-----------------------------|------------------------------|---------------------------|---------------------------|---------------------------|
| <b>Overall</b>            | 240                         |                              |                           |                           |                           |
| <b>Pharmacy Refill</b>    |                             |                              |                           |                           |                           |
| <b>Alternate Measure:</b> |                             |                              |                           |                           |                           |
| <b>1 cut point</b>        |                             |                              |                           |                           |                           |
| <b>Low /Medium</b>        |                             |                              |                           |                           |                           |
| (PDC <0.8)                | 82 (13.6)                   | 1.28 (0.98, 1.68)            | 1.32(1.01, 1.73)*         | 1.22 (0.93,1.60)          | 1.20 (0.91, 1.58)         |
| <b>High</b>               |                             |                              |                           |                           |                           |
| (PDC ≥0.8)                | 158 (10.7)                  | 1(reference)                 | 1(reference)              | 1(reference)              | 1(reference)              |
| <b>Pharmacy Refill</b>    |                             |                              |                           |                           |                           |
| <b>Alternate Measure:</b> |                             |                              |                           |                           |                           |
| <b>2 cut points</b>       |                             |                              |                           |                           |                           |
| <b>Low</b>                |                             |                              |                           |                           |                           |
| (PDC <0.5)                | 15 (14.9)                   | 1.47 (0.86, 2.49)            | 1.57 (0.91, 2.68)         | 1.84 (1.06, 3.17)*        | 1.66 (0.95, 2.92)         |
| <b>Medium</b>             |                             |                              |                           |                           |                           |
| (PDC 0.5-<0.8)            | 67 (13.2)                   | 1.25 (0.94, 1.66)            | 1.28 (0.96, 1.71)         | 1.13 (0.85, 1.52)         | 1.14 (0.85, 1.52)         |
| <b>High</b>               |                             |                              |                           |                           |                           |
| (PDC ≥0.8)                | 158 (10.7)                  | 1(reference)                 | 1(reference)              | 1(reference)              | 1(reference)              |

\*p<0.05, †p<0.01

HR-Hazards Ratio; 95% CI - 95% confidence interval

Composite CVD outcome-myocardial infarction, congestive heart failure, stroke, or cardiovascular death

CoSMO-Cohort Study of Medication Adherence among Older Adults

PDC-proportion of days covered

CVD-cardiovascular disease;

Model 1 adjusted for age, gender, race, marital status, and education.

Model 2 adjusted for age, gender, race, marital status, education, Charlson Comorbidity Index, number of classes of antihypertensive medications, and depressive symptoms.

Model 3 adjusted for age, gender, race, marital status, education, Charlson Comorbidity Index, number of classes of antihypertensive medications, depressive symptoms, smoking status, body mass index, alcohol intake, and healthy lifestyles for blood pressure control (fruit and vegetable intake, exercise, and sodium reduction)
